# Supplementary material for: Gold nanorods or nanospheres? Role of particle shape on tuning the shape memory effect of semicrystalline poly(ε-caprolactone) networks
Source: Royal Society of Chemistry journal article supplement (doi:10.1039/c8ra06715e), 2018-01-01
Supplement: c8ra06715e1.pdf [file c8ra06715e1.pdf]

## Supporting Information

### Gold Nanorods or Nanospheres? Role of Particle Shape on Tuning the Shape Memory Effect of Semicrystalline Poly( $\epsilon$ -caprolactone) Networks

*Haikun Xu and Bridgette M. Budhlall\**

*Department of Plastics Engineering and Nanomanufacturing Center, University of Massachusetts, Lowell MA. 01854, USA*

#### Contents:

|                                                                                                                                             |     |
|---------------------------------------------------------------------------------------------------------------------------------------------|-----|
| <sup>1</sup> H NMR spectrum of step I monomer (3- Phenyl-acrylic Acid 4-hydroxyl-cyclohexyl Ester) (Figure S1).....                         | S2  |
| <sup>1</sup> H NMR spectrum of step II monomer (3-Phenyl-acrylic Acid 4-Oxocyclohexyl Ester) (Figure S2).....                               | S2  |
| <sup>1</sup> H NMR spectrum of step III monomer (3-Phenyl Acrylic Acid 4-Oxo-oxepan-4-yl Ester) (Figure S3).....                            | S3  |
| <sup>1</sup> H NMR spectrum of PCL modified tri-block copolymer (homo-block) (Figure S4).....                                               | S3  |
| TGA curve for the SMP without AuNPs (Figure S5).....                                                                                        | S4  |
| TGA curve for SMP/AuNS (0.2wt%) composite (Figure S6).....                                                                                  | S4  |
| TGA curve for SMP/AuNR (0.2wt%) composite (Figure S7).....                                                                                  | S5  |
| TEM images of SMP/AuNRs sample and the gold nanorods (Figure S8).....                                                                       | S6  |
| SEM images of SMP/AuNR samples with EDS spectrum (Figure S9).....                                                                           | S7  |
| Photograph of the self-customized UV-crosslinking set-up (Figure S10).....                                                                  | S8  |
| Photograph of uniformly dispersed AuNS and AuNR in the SMP acetone solution (Figure S11).....                                               | S8  |
| Photograph of uniformly dispersed AuNR and AuNS in the SMP film made in a Teflon mold (Figure S12).....                                     | S9  |
| Cyclic, thermomechanical experiments for crosslinked SMP (Figure S13).....                                                                  | S9  |
| Aspect Ratio, Concentrations and SPR Peak Wavelength of AuNPs in SMP (Table S1).....                                                        | S10 |
| Description of a time-continuous movie showing IR laser-triggered shape recovery tests for the SMP/AuNR nanocomposite films (Movie M1)..... | S10 |

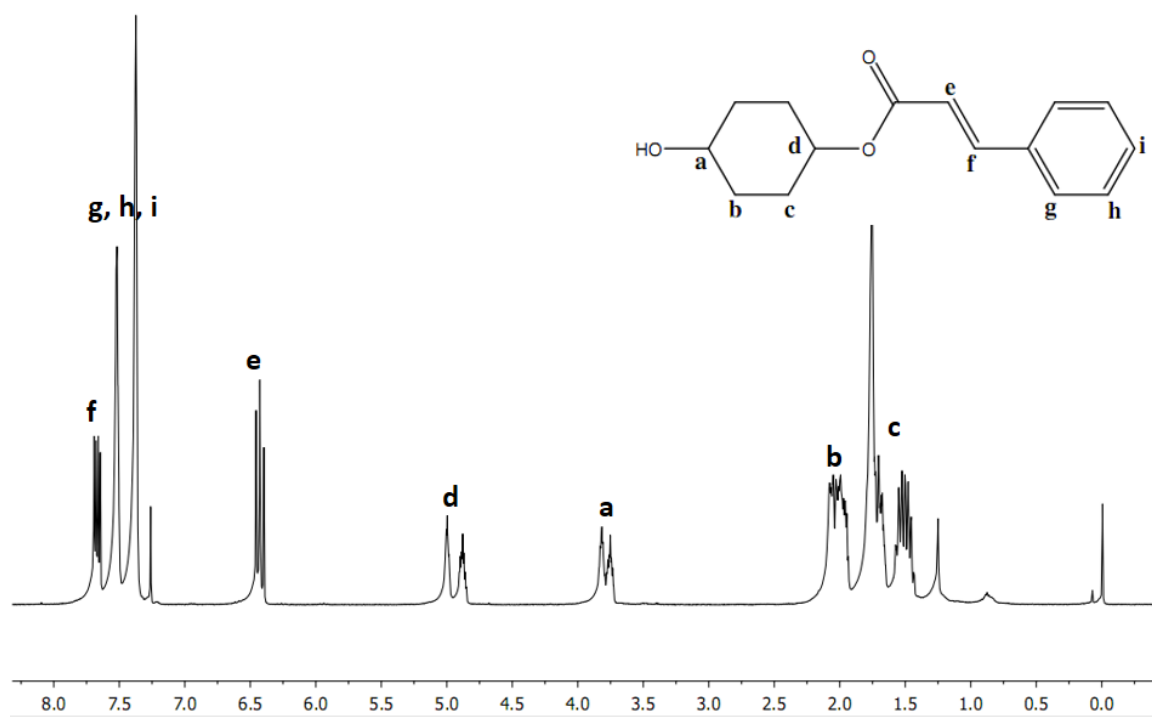

**Figure S1.** <sup>1</sup>H NMR spectrum of step I monomer (3- Phenyl-acrylic Acid 4-hydroxyl-cyclohexyl Ester).

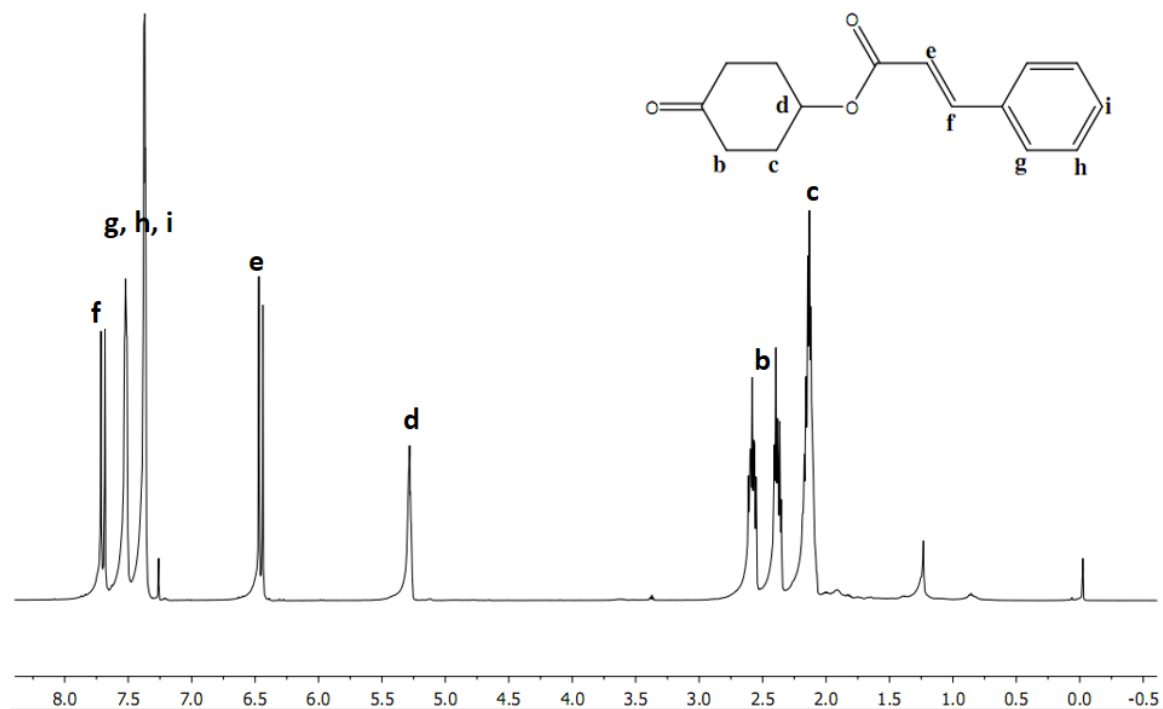

**Figure S2.** <sup>1</sup>H NMR spectrum of step II monomer (3-Phenyl-acrylic Acid 4-Oxocyclohexyl Ester).

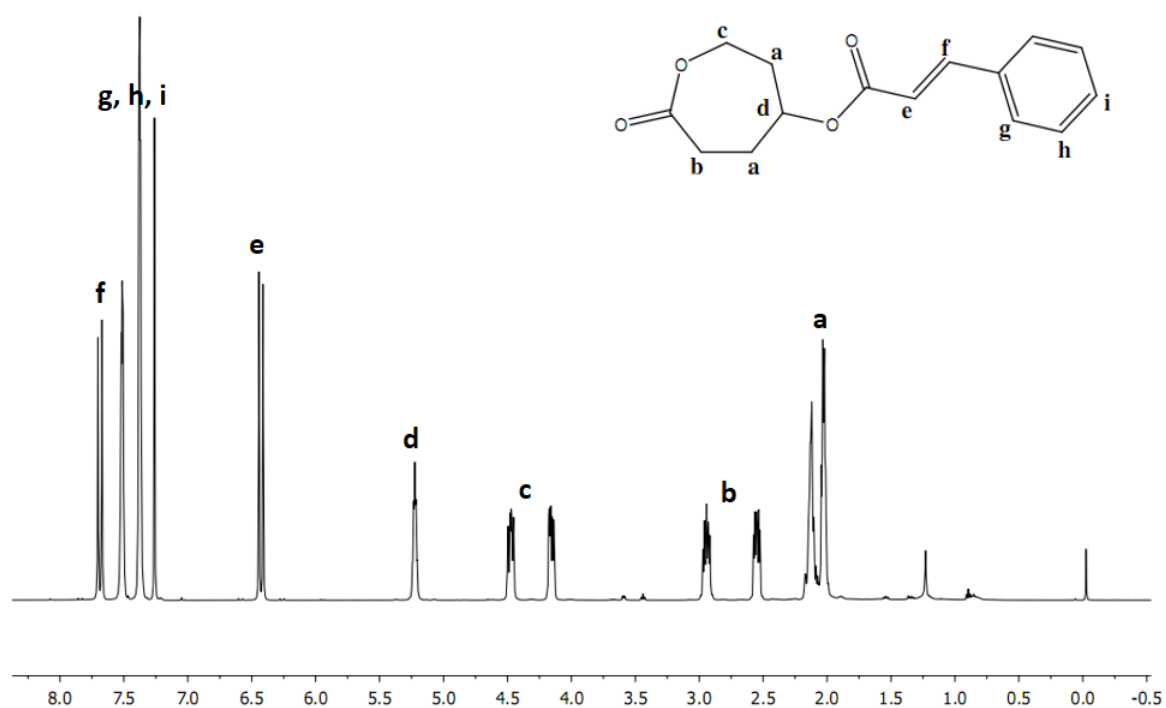

**Figure S3.** <sup>1</sup>H NMR spectrum of step III monomer (3-Phenyl Acrylic Acid 4-Oxo-oxepan-4-yl Ester).

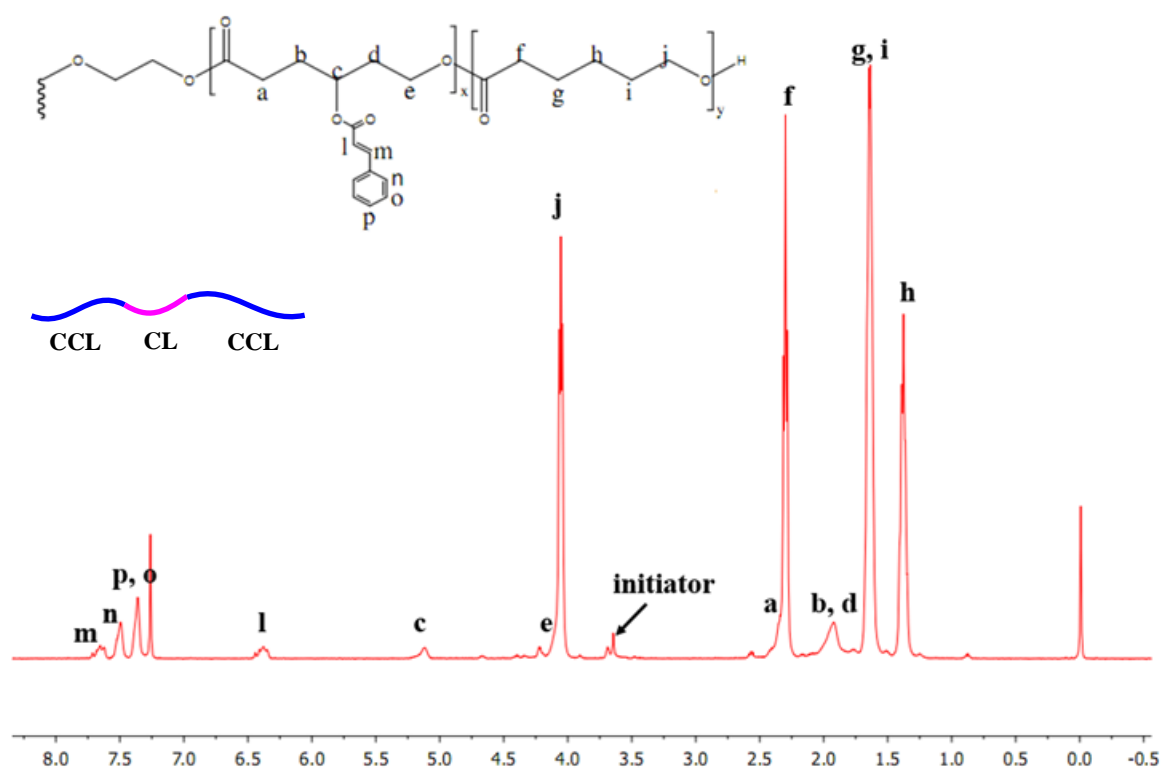

**Figure S4.** <sup>1</sup>H NMR spectrum of PCL modified tri-block copolymer (homo-block).

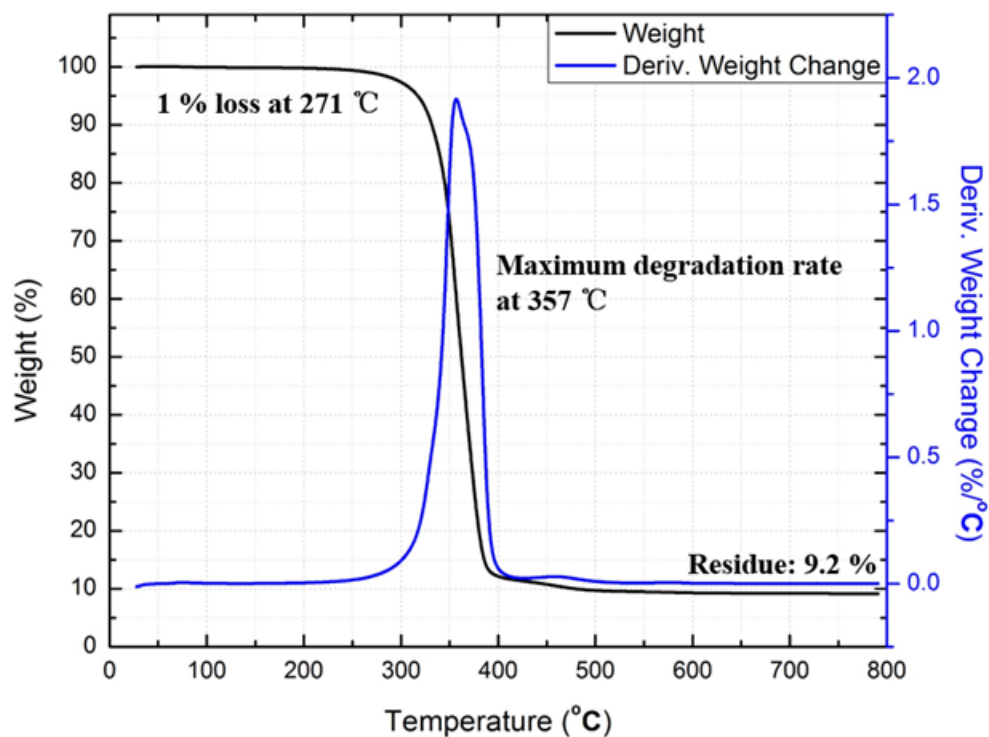

**Figure S5.** TGA curve for the SMP without AuNPs.

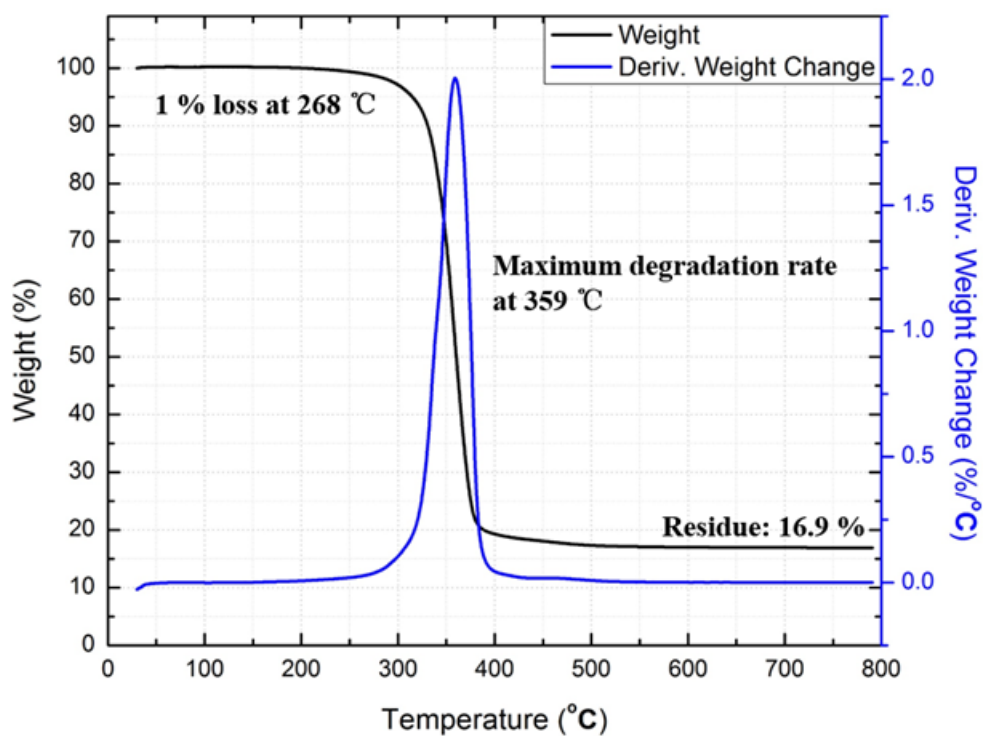

**Figure S6.** TGA curve for SMP/AuNS (0.2wt%) composite.

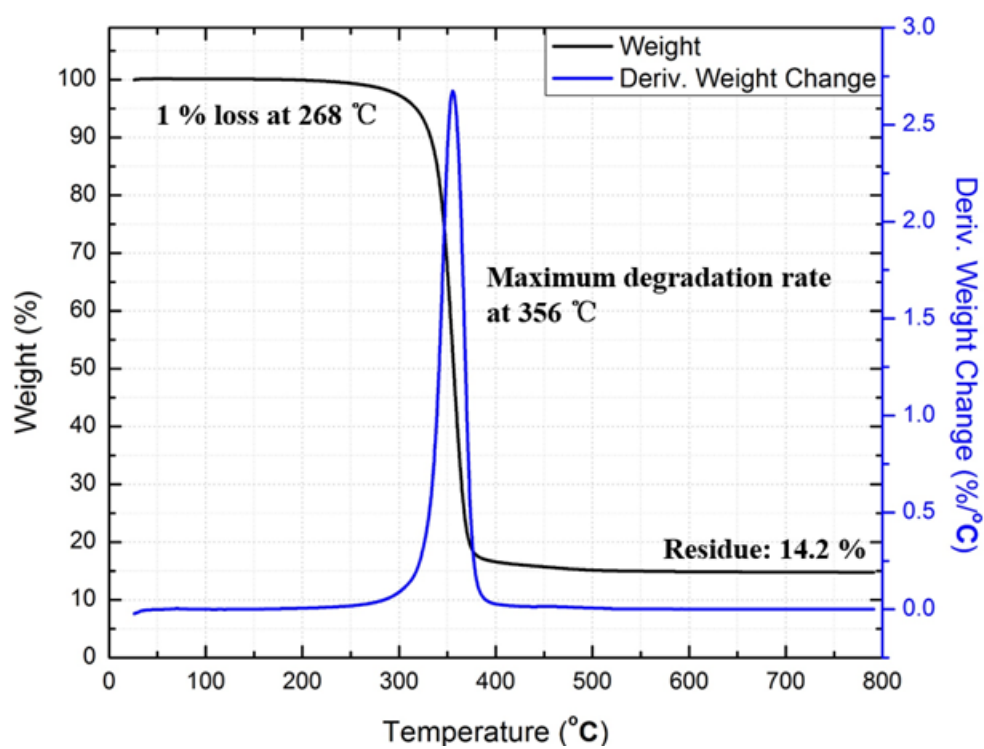

**Figure S7.** TGA curve for SMP/AuNR (0.2wt%) composite.

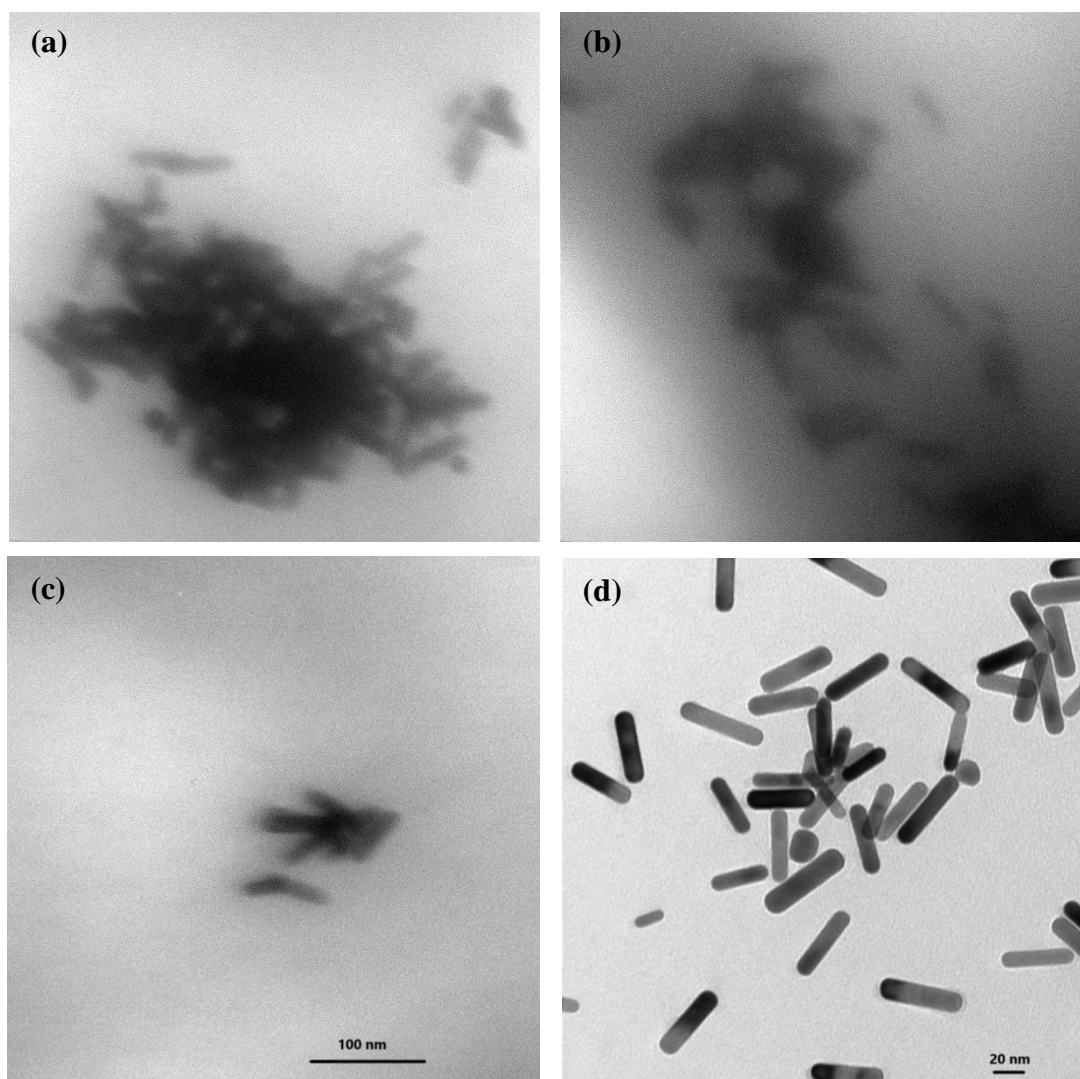

**Figure S8.** TEM images of gold nanorods (a-c) after incorporation into the SMP nanocomposites at 0.2 wt% loading and, (d) before incorporation into the SMP. The nanorods exhibited an aspect ratio of  $\sim 4$ , with an average length and width of  $40 \pm 5$  nm and  $10 \pm 2$  nm respectively, in both samples. The TEM images in (a-c) are shown at the same magnification.

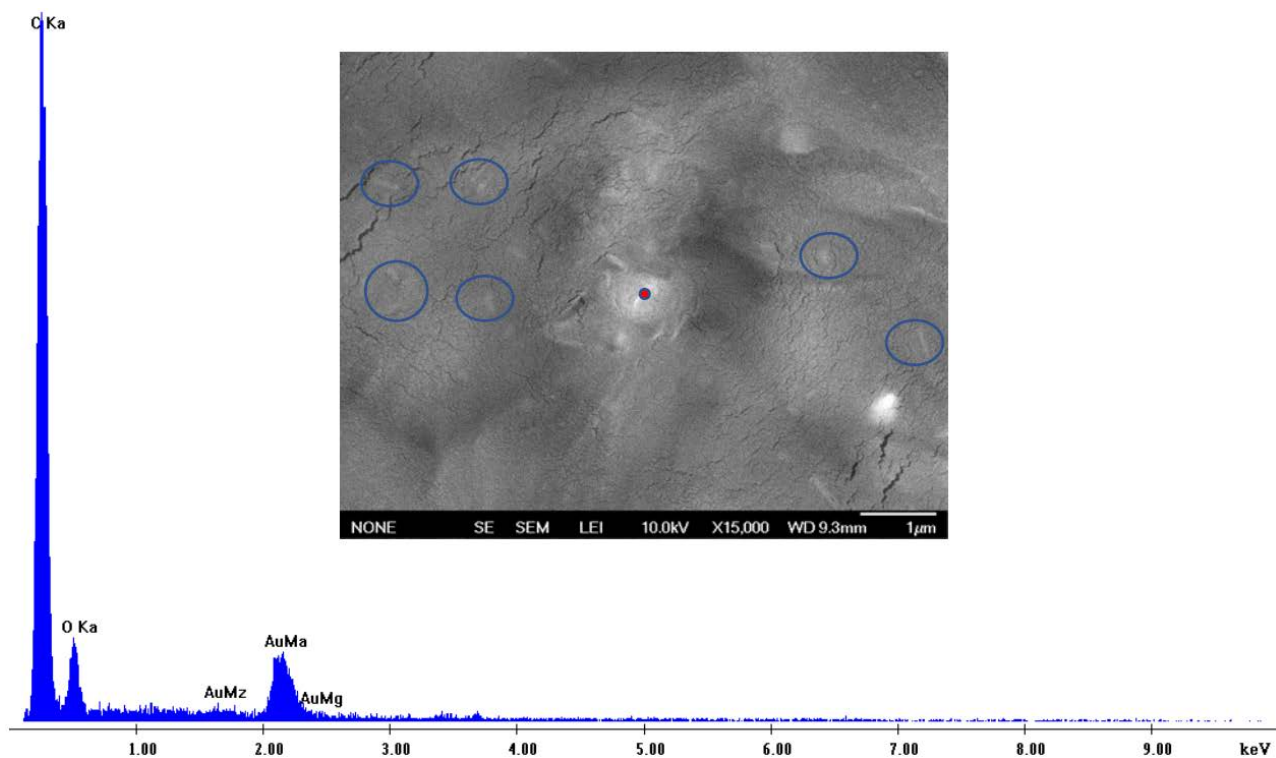

**Figure S9.** SEM images of the SMP/AuNR sample with EDS spectrum taken at the cluster of rod-shaped structure (marked by ●). Many individual AuNRs are highlighted with ○

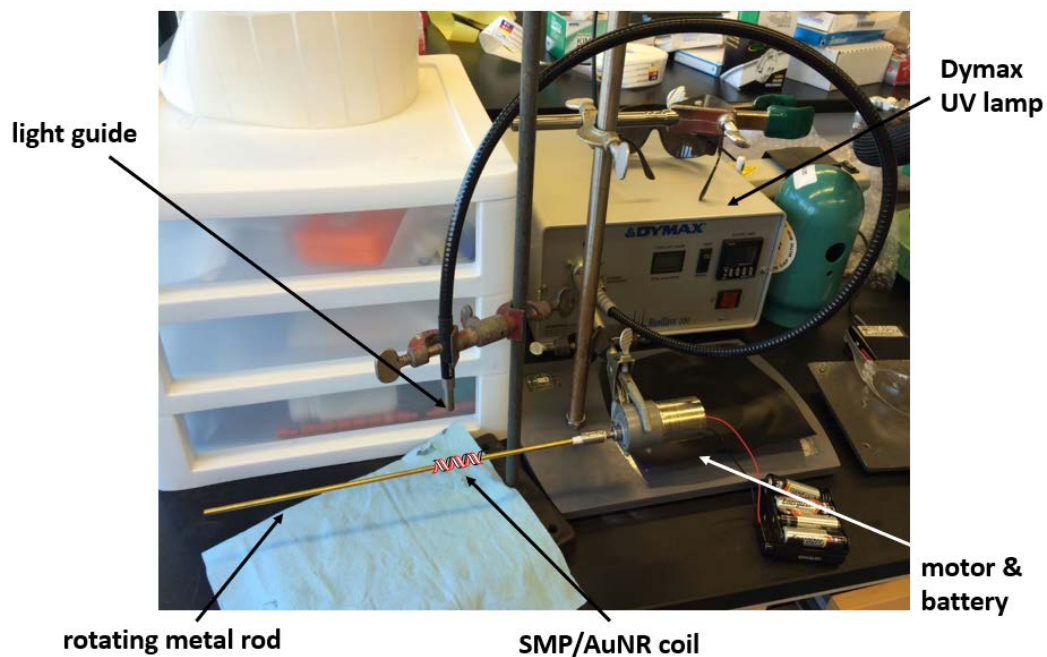

**Figure S10.** Photograph of the self-customized UV-crosslinking setup.

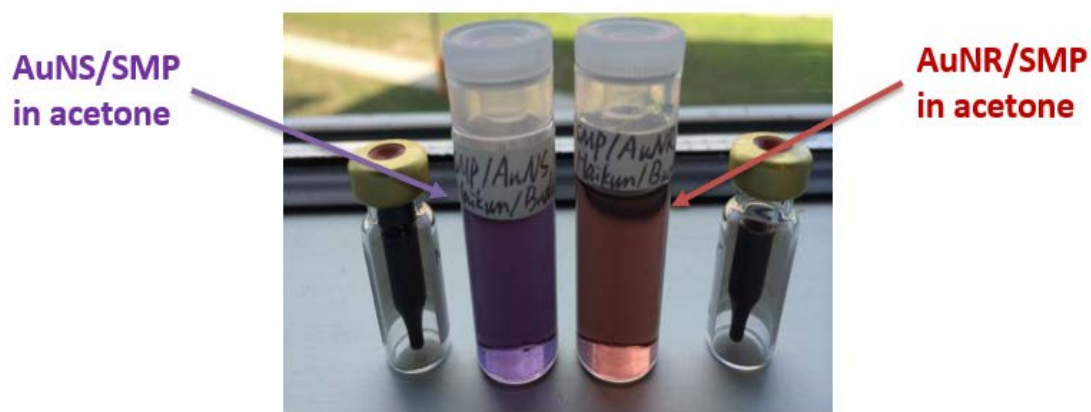

**Figure S11.** Photograph of uniformly dispersed AuNS (left) and AuNR (right) in the SMP solution in acetone.



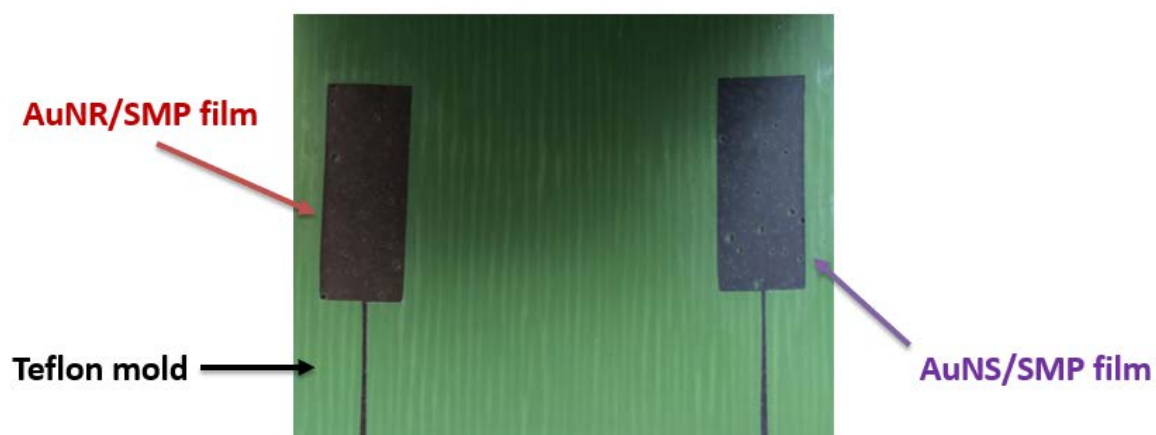

**Figure S12.** Photograph of uniformly dispersed AuNR (left) and AuNS (right) in the SMP film in a Teflon mold.

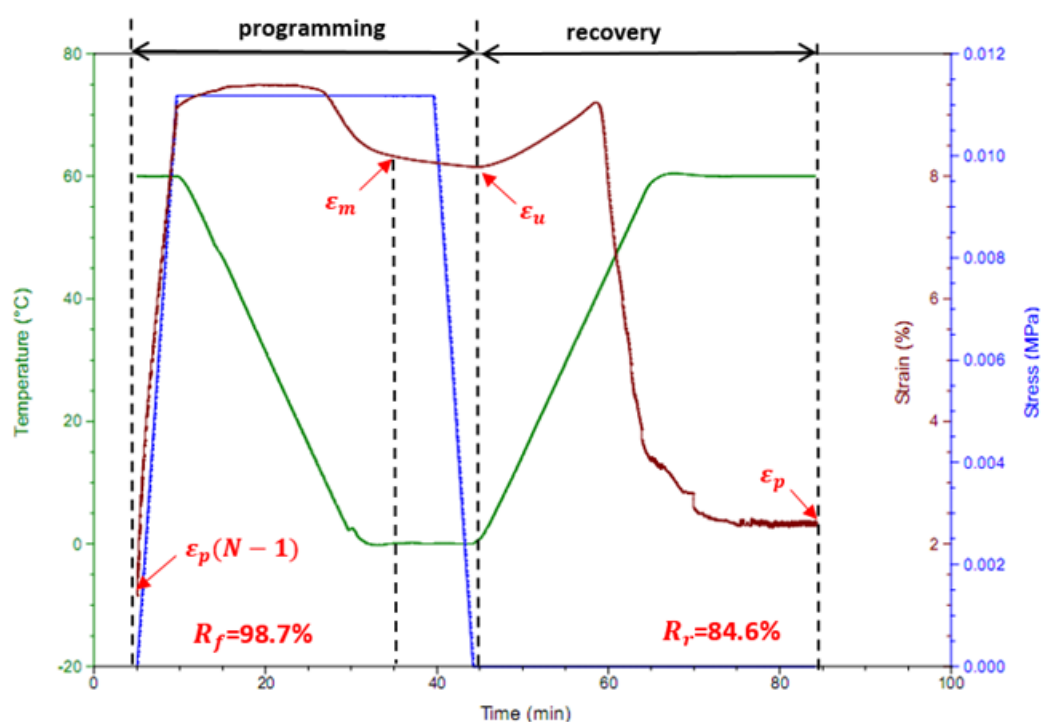

**Figure S13.** DMA curve of thermos-mechanical test for the shape memory polymer. The shape programming and shape recovery procedures are shown in the curve. This is the first thermo-mechanical shape memory cycle. The shape fixity ratio ( $R_f$ ) and shape recovery ratio ( $R_r$ ) were calculated to be 98.7% and 84.6%, respectively.

**Table S1. Aspect Ratio, Concentrations and SPR Peak Wavelength of AuNPs in SMP**

| <b>Nanocomposite Sample</b> | <b>Size of AuNP (nm)</b>                          | <b>Concentration of AuNP (wt %)</b> | <b>SPR Peak Wavelength (nm)</b> |
|-----------------------------|---------------------------------------------------|-------------------------------------|---------------------------------|
| SMP/AuNR                    | Diameter: 10<br>Length: 41<br>(Aspect ratio: 4.1) | 0.10                                | 808                             |
| SMP/AuNR                    |                                                   | 0.20                                | 808                             |
| SMP/AuNS                    | Diameter: 20                                      | 0.20                                | 520                             |

**Movie S1:** A visual demonstration of IR laser-triggered shape recovery tests was video-recorded at a rate of 60 fps. In the first half of the movie, the AuNR/SMP nanocomposite film recovered to a permanent coil upon radiation of the IR laser. The second half of the movie demonstrated the reversed process of converting to a flat strip from a AuNR/SMP nanocomposite coil shape.
